# Supplementary material for: One-pot asymmetric living copolymerization-induced chiral self-assemblies and circularly polarized luminescence
Source: Royal Society of Chemistry journal article supplement (doi:10.1039/d3sc06242b), 2024-01-01
Supplement: d3sc06242b1.pdf [file d3sc06242b1.pdf]

Electronic Supplementary Material (ESI) for Chemical Science.  
This journal is © The Royal Society of Chemistry 2021

## Electronic Supplementary Information

### **One-Pot Asymmetric Living Copolymerization-induced Chiral Self-assemblies and Circularly Polarized Luminescence**

Run-Tan Gao,<sup>a</sup> Shi-Yi Li,<sup>a</sup> Bing-Hao Liu,<sup>a</sup> Zheng Chen,<sup>a</sup> Na Liu,<sup>\*,b</sup> Li Zhou,<sup>c</sup> and Zong-Quan Wu<sup>\*,a</sup>

<sup>a</sup>State Key Laboratory of Supramolecular Structure and Materials, College of Chemistry, Jilin University, Changchun 130012, China.

<sup>b</sup>The School of Pharmaceutical Sciences, Jilin University, 1266 Fujin Road, Changchun, Jilin 130021, P.R. China.

<sup>c</sup>Department of Polymer Science and Engineering, Hefei University of Technology, Hefei 230009, China.

## Table of Contents

|                                                                                                                                                                                                  |         |
|--------------------------------------------------------------------------------------------------------------------------------------------------------------------------------------------------|---------|
| <b>General considerations</b> .....                                                                                                                                                              | S3-S4   |
| <b>Synthetic procedure</b> .....                                                                                                                                                                 | S4      |
| Synthesis of monomer <b>1</b> .....                                                                                                                                                              | S5-S6   |
| Typical polymerization procedure .....                                                                                                                                                           | S7      |
| Kinetic study for the block copolymerization .....                                                                                                                                               | S8      |
| High solid content polymerization induced self-assembly process .....                                                                                                                            | S9      |
| AFM and TEM measurements .....                                                                                                                                                                   | S9-S10  |
| Emission and CPL measurements .....                                                                                                                                                              | S10     |
| <b>Fig. S1.</b> SEC curves for the copolymerization of <b>2</b> initiated by <i>R</i> -poly- <b>1</b> <sub>105</sub> .....                                                                       | S11     |
| <b>Fig. S2.</b> FT-IR spectra of poly- <b>2</b> <sub>30</sub> , <i>R</i> -poly( <b>1</b> <sub>105</sub> - <i>b</i> - <b>2</b> <sub>98</sub> ), and <i>R</i> -poly- <b>1</b> <sub>105</sub> ..... | S11     |
| <b>Fig. S3.</b> TGA curves of <i>R</i> -poly- <b>1</b> <sub>105</sub> , <i>R</i> -poly( <b>1</b> <sub>105</sub> - <i>b</i> - <b>2</b> <sub>98</sub> ) and poly- <b>2</b> <sub>30</sub> .....     | S12     |
| <b>Fig. S4.</b> DSC curves of <i>R</i> -poly- <b>1</b> <sub>105</sub> , <i>R</i> -poly( <b>1</b> <sub>105</sub> - <i>b</i> - <b>2</b> <sub>98</sub> ) and poly- <b>2</b> <sub>30</sub> .....     | S12     |
| <b>Fig. S5.</b> CD and UV-vis spectra of <i>R</i> -poly- <b>1</b> <sub>105</sub> and <i>S</i> -poly- <b>1</b> <sub>105</sub> .....                                                               | S13     |
| <b>Fig. S6.</b> CD and UV-vis of <i>R</i> -poly- <b>1</b> <sub>105</sub> in THF at different concentrations .....                                                                                | S13     |
| <b>Fig. S7.</b> CD and UV-vis of <i>R</i> -poly- <b>1</b> <sub>105</sub> in THF at different temperatures .....                                                                                  | S14     |
| <b>Fig. S8.</b> UV-vis spectra and <i>g</i> (CD) value at 460 nm of <i>R</i> -poly( <b>1</b> <sub>105</sub> - <i>b</i> - <b>2</b> <sub><i>n</i></sub> ) .....                                    | S14     |
| <b>Fig. S9.</b> AFM images of the <i>S</i> -poly( <b>1</b> <sub>105</sub> - <i>b</i> - <b>2</b> <sub><i>n</i></sub> ) <i>s</i> .....                                                             | S15     |
| <b>Fig. S10.</b> TEM images of <i>S</i> -poly( <b>1</b> <sub>105</sub> - <i>b</i> - <b>2</b> <sub><i>n</i></sub> ) <i>s</i> .....                                                                | S15     |
| <b>Fig. S11.</b> AFM images of the <i>R</i> - and <i>S</i> - copolymer mixtures .....                                                                                                            | S16     |
| <b>Fig. S12.</b> TEM images of the <i>R</i> - and <i>S</i> - copolymer mixtures .....                                                                                                            | S16     |
| <b>Fig. S13.</b> Photographs of copolymerization of <b>2</b> by Pd(II)-terminated <i>R</i> -poly- <b>1</b> <sub>105</sub> .....                                                                  | S16     |
| <b>Fig. S14.</b> Emission and CPL spectra of <i>R</i> - and <i>S</i> -poly( <b>1</b> <sub>105</sub> - <i>b</i> - <b>2</b> <sub><i>n</i></sub> ) copolymers .....                                 | S17     |
| <b>Fig. S15.</b> Plot of <i>g</i> <sub>lum</sub> against the DP of PPE blocks of <i>R</i> -poly( <b>1</b> <sub>105</sub> - <i>b</i> - <b>2</b> <sub><i>n</i></sub> ) .....                       | S17     |
| <b>Fig. S16-S18.</b> <sup>1</sup> H NMR and <sup>13</sup> C NMR spectra of monomer <b>1</b> and <b>2</b> .....                                                                                   | S18-S19 |
| <b>Fig. S19-S30.</b> <sup>1</sup> H NMR spectra of poly( <b>1</b> <sub>105</sub> - <i>b</i> - <b>2</b> <sub><i>n</i></sub> ) .....                                                               | S19-S25 |
| <b>References</b> .....                                                                                                                                                                          | S26-S27 |

**General considerations.** The nuclear magnetic resonance (NMR) spectra were recorded using a Bruker 600 MHz or 400 MHz spectrometer {H}. Chemical shifts are reported in delta ( $\delta$ ) units and expressed in parts per million (ppm) downfield from tetramethylsilane using the residual proton solvent as an internal standard. Size exclusion chromatography (SEC) was performed on Waters 1515 pump and Waters 2414 differential refractive index (RI) detector (set at 40 °C). A series of two linear TSK gel GMHHR-H columns were used. Molecular weight ( $M_n$ ) and its polydispersity ( $M_w/M_n$ ) values were reported with reference to the polystyrene standards. The eluent was tetrahydrofuran (THF) at a flow rate of 0.8 mL/min. FT-IR spectra were recorded on Perkin-Elmer Spectrum BX FT-IR system using KBr pellets at 25 °C. Circular dichroism (CD) spectra were obtained in a 1.0 cm or 1.0 mm quartz cell using a JASCO J1500 spectropolarimeter. Absorption spectra were recorded on UNIC 4802 UV/vis double beam spectrophotometer in a 1.0 mm quartz cell at 25 °C. Emission spectra were recorded on Hitachi F-4600 fluorescence spectrophotometer. The circularly polarized luminescence (CPL) spectra using a JASCO CPL-300 spectrometer at room temperature. Atomic force microscope (AFM) was performed on a Cypher S microscope (Oxford Instruments, Asylum Research). Transmission electron microscopy (TEM) was performed on a JEM-2100F operating at 200 kV accelerating voltage. Dynamic light scattering (DLS) was recorded using a Nano-ZS 90 Zetasizer of Malvern (UK) instrument. Differential scanning calorimetric (DSC) measurements were carried on a Mettler-Toledo DSC821e instrument. Samples were first heated from 30 °C to 250 °C at a heating rate of 10 °C/min under nitrogen atmosphere. Thermogravimetric analysis (TGA)

was performed under a nitrogen atmosphere at a heating rate of 10 °C/min from 30 to 800 °C using a Netzsch TG 209 F3 instrument. All solvents and chemicals were purchased from Sinopharm, and Aladdin Co. Ltd., and were purified by the standard procedures before used. Tetrahydrofuran (THF) and diisopropylamine (*i*Pr<sub>2</sub>NH) for polymerizations were further dried over sodium benzophenone ketyl, distilled onto lithium aluminum hydride under nitrogen, and distilled under high vacuum just before use. Monomer **1**, **2**, and Wei-phos ligands (L<sup>S</sup> and L<sup>R</sup>) were prepared according to the literatures with modifications and the structures were confirmed by <sup>1</sup>H NMR.<sup>1-5</sup>

### Synthetic procedure:

#### Scheme S1. Synthesis of monomer **1**

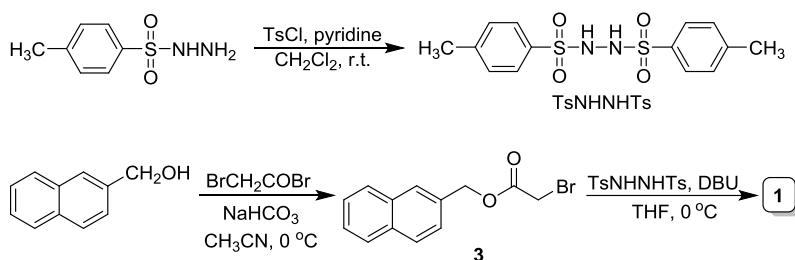

*Synthesis of N,N'*-ditosylhydrazine (TsNHNHTs). This compound was prepared following the reported literatures with slight modifications.<sup>1</sup> A flame-dried 500 mL round-bottomed flask fitted with a magnetic stir bar was charged with *p*-toluenesulfonyl hydrazide (18.2 g, 0.1 mol) and *p*-toluenesulfonyl chloride (28.4 g, 0.2 mol) in anhydrous  $\text{CH}_2\text{Cl}_2$  (200 mL). The mixed suspension was stirred at room temperature while pyridine (10.0 mL, 150.0 mmol) was added dropwise over 1.5 min. During the addition of pyridine, the reaction mixture became homogenous and turned yellow. White precipitate was observed

within 3 min and the reaction mixture was stirred for further 1.5 h. Diethyl ether (400 mL) and H<sub>2</sub>O (200 mL) were added and the resulting mixture was stirred at 0 °C for 15 min. The white solid which precipitated was collected in a Büchner funnel using suction filtration and washed with diethyl ether (100 mL). The solid thus obtained was dissolved in boiling methanol (400 mL). After cooling to room temperature, precipitate appeared. About 200 mL of methanol was removed by rotary evaporation and cooled to 0 °C. The precipitate was collected in a Büchner funnel using suction filtration and washed with cold methanol (20 mL) and diethyl ether (100 mL) to give *N,N'*-ditosylhydrazine (TsNHNHTs) as a white solid (20.1 g, 83%).

*Synthesis of 1.* The monomer **1** was prepared following the reported literatures with slight modifications.<sup>1-2</sup> Under N<sub>2</sub> atmosphere, bromoacetyl bromide (3.5 mL, 38.0 mmol) was added dropwise to a stirred suspension of benzyl alcohol (5.0 g, 32.0 mmol) and NaHCO<sub>3</sub> (8.1 g, 96.0 mmol) in acetonitrile (100 mL) at 0 °C. The resulting mixture was stirred for 10 min at this temperature. After the addition of H<sub>2</sub>O, the mixture was extracted with CH<sub>2</sub>Cl<sub>2</sub>, and the organic phase was dried over anhydrous Na<sub>2</sub>SO<sub>4</sub>. After the removal of the solvent by evaporation under reduced pressure, the residue was used in the next step without further purification. The obtained residue (8.9 g, 32.0 mmol) and TsNHNHTs (15.3 g, 44.8 mmol) was dissolved in THF (100 mL) and cooled to 0 °C. After 1, 8-diazabicyclo [5.4.0] undec-7-ene (DBU, 14.0 mL, 96.0 mmol) was added dropwise, the mixture was stirred for 10 min at this temperature. The reaction was quenched by adding saturated aqueous NaHCO<sub>3</sub>, then extracted with diethyl ether. The combined organic phase was

washed with brine, dried over anhydrous Na<sub>2</sub>SO<sub>4</sub>, and evaporated to dryness to give a crude product as a yellowish oil. This material was further purified by silica gel column chromatography using ethyl acetate/*n*-hexane (v/v = 8:1) as eluent, afforded monomer **1** as a yellowish oil (6.5 g, 90 % yield). <sup>1</sup>H NMR (600 MHz, CDCl<sub>3</sub>, 25 °C): δ 7.86–7.83 (m, 4H, ArH), 7.51–7.26 (m, 3H, ArH), 5.36 (s, 2H, CH<sub>2</sub>), 4.87 (s, 1H, N<sub>2</sub>CH).

*Preparation of the R- and S-Pd(II) catalysts.* These catalyst solutions were prepared following the reported literature.<sup>3</sup> A solution of commercial available  $\pi$ -allyl PdCl (10.5 mg, 0.03 mmol) in THF (1.0 mL) was treated with Wei-Phos (16.5 mg, 0.03 mmol) at room temperature. After the resulting mixture was stirred at room temperature for 0.5 h, it was directly used in the polymerization without further purification.

*Synthesis of R- and S-poly-1<sub>m</sub>.* Taking poly-**1**<sub>105</sub> as an example. A solution of the as-prepared  $\pi$ -allyl PdCl/L<sup>R</sup> catalyst in THF (0.03 mol/L, 0.3 mL, 0.009 mmol) was added to a solution of monomer **1** (100.0 mg, 0.9 mmol) in THF (0.7 mL) at room temperature. The concentrations of the monomer and the catalyst were 0.9 mol/L and 0.009 mol/L, respectively, corresponding to the feed ratio of monomer to catalyst was 100/1. The reaction mixture was stirred at room temperature and a large amount of bubble was released upon the addition of the Pd(II) catalyst. After the polymerization solution was stirred for 30 min, it was precipitated into a large amount of *n*-hexane. The precipitated solid was collected by centrifugation and dried in vacuum at room temperature overnight, afforded *R*-poly-**1**<sub>105</sub> as a white solid (83.0 mg, 83% yield). SEC:  $M_n = 4.7$  kDa,  $M_w/M_n = 1.15$ . <sup>1</sup>H NMR (600 MHz, CDCl<sub>3</sub>, 25 °C): δ 7.26–7.04 (br, 753H, ArH), 4.76 (br, 214H, OCH<sub>2</sub>),

3.77 (br, 105H, CH of main chain), 3.02-3.05 (br, 2H, CH<sub>2</sub> of allyl). FT-IR (KBr, 25 °C): 3049 ( $\nu_{\text{Ar-H}}$ ), 2919 ( $\nu_{\text{C-H}}$ ), 2845 ( $\nu_{\text{C-H}}$ ), 1720 ( $\nu_{\text{C=O}}$ )  $\text{cm}^{-1}$ .

*S*-poly-**1**<sub>105</sub> was prepared following the same procedure using  $\pi$ -allyl PdCl/L<sup>S</sup> catalyst in 85% yield. SEC:  $M_n = 5.9$  kDa,  $M_w/M_n = 1.16$ . <sup>1</sup>H NMR (600 MHz, CDCl<sub>3</sub>, 25 °C):  $\delta$  7.26–7.04 (br, 760H, ArH), 4.76 (br, 215H, OCH<sub>2</sub>), 3.77 (br, 105H, CH of main chain), 3.02-3.05 (br, 2H, CH<sub>2</sub> of allyl). FT-IR (KBr, 25 °C): 3105 ( $\nu_{\text{Ar-H}}$ ), 2930 ( $\nu_{\text{C-H}}$ ), 2855 ( $\nu_{\text{C-H}}$ ), 1705 ( $\nu_{\text{C=O}}$ )  $\text{cm}^{-1}$ .

*Typical block copolymerization procedure.* The block copolymerization was carried out following Scheme 1 in the main text. A solution of the Pd(II)-terminate *R*-poly-**1**<sub>105</sub> macroinitiator (45.4 mg) in THF (0.5 mL) was added to the mixture of monomer **2** (40.8 mg, 0.09 mmol), CuI (1.7 mg, 0.01 mmol), and <sup>i</sup>Pr<sub>2</sub>NH (0.5 mL) ( $[\mathbf{2}]_0/[\text{Pd}]_0 = 100$ ). The solution was stirred at 55 °C for 12 h. The solution was poured in a large amount of *n*-hexane, the precipitated light yellowish solid was collected by centrifugation and washed with acetone three times. The collected solid was dried in vacuum at room temperature overnight afforded the expected block copolymer *R*-poly(**1**<sub>105</sub>-*b*-**2**<sub>98</sub>) (63.7 mg, 74% yield). SEC:  $M_n = 12.1$  kDa,  $M_w/M_n = 1.18$ . <sup>1</sup>H NMR (600MHz, CDCl<sub>3</sub>, 25 °C):  $\delta$  7.26–6.59 (br, 984H, ArH of poly-**1**<sub>105</sub> segment and ArH of poly-**2**<sub>98</sub> segment), 4.76 (br, 210H, OCH<sub>2</sub> of poly-**1**<sub>105</sub> segment), 4.03-3.34 (br, 298H, OCH<sub>2</sub> of poly-**2**<sub>98</sub> segment and CH of poly-**1**<sub>105</sub> main chain), 1.88–1.79 (br, 410H, OCH<sub>2</sub>CH<sub>2</sub> of poly-**2**<sub>98</sub> segment), 1.60–1.46 (br, 392H, CH<sub>2</sub> of poly-**2**<sub>98</sub> segment), 1.40–1.21 (br, 1590H, CH<sub>2</sub> of poly-**2**<sub>98</sub> segment), 0.91–0.82 (br, 605H, CH<sub>3</sub> of poly-**2**<sub>98</sub> segment). FT-IR (KBr, 25 °C): 3054 ( $\nu_{\text{C-H}}$ ), 2922 ( $\nu_{\text{Ar-H}}$ ), 2856 ( $\nu_{\text{Ar-}}$

H), 2196 ( $\nu_{\text{C}=\text{C}}$ ), 1718 ( $\nu_{\text{C}=\text{O}}$ ), 1140 ( $\nu_{\text{C}-\text{O}-\text{C}}$ ), 1016 ( $\nu_{\text{C}-\text{O}-\text{C}}$ )  $\text{cm}^{-1}$ .

*Synthesis of poly-2<sub>98</sub>*. This polymer was prepared according to the reported literature.<sup>4</sup> Under N<sub>2</sub> atmosphere, monomer **2** (100.0 mg, 0.2 mmol), the ethynyl Pd(II) complex<sup>4</sup> (1.1 mg, 0.002 mmol) and triphenylphosphine (2.1 mg, 0.008 mmol) and CuI (1.5 mg, 0.008 mmol) were dissolved in THF (0.5 mL) and triethylamine (0.5 mL). After the resulting mixture was stirred at 55 °C for 8 h, the solution was precipitated into a large amount of methanol. The precipitated solid was collected by filtration, and washed with acetone to precipitate and purify poly-**2**<sub>98</sub>, which was collected by centrifugation and dried under vacuum at room temperature overnight to obtain a yellow solid. (91.0 mg, 90 % yield). SEC:  $M_n = 22.1$  kDa,  $M_w/M_n = 1.12$ . <sup>1</sup>H NMR (600MHz, CDCl<sub>3</sub>, 25 °C):  $\delta$  7.02 (s, 212H, ArH), 4.03 (br, 410H, OCH<sub>2</sub>), 3.81 (s, 3H, OCH<sub>3</sub>), 1.88–1.79 (br, 412H, OCH<sub>2</sub>CH<sub>2</sub>), 1.60–1.46 (br, 513H, CH<sub>2</sub>), 1.40–1.21 (br, 1589H, CH<sub>2</sub>), 0.91–0.82 (br, 589H, CH<sub>3</sub>). <sup>13</sup>C NMR (150 MHz, CDCl<sub>3</sub>, 25 °C):  $\delta$  153.47, 117.24, 114.29, 91.58, 69.67, 31.86, 29.42, 29.33, 26.10, 26.01, 22.67, 14.09. FT-IR (KBr, 25 °C): 2952 ( $\nu_{\text{C}-\text{H}}$ ), 2925 ( $\nu_{\text{C}-\text{H}}$ ), 2853 ( $\nu_{\text{C}-\text{H}}$ ), 2200 ( $\nu_{\text{C}=\text{C}}$ )  $\text{cm}^{-1}$ .

*Kinetic study for the block copolymerization*: A solution of the macroinitiator R-poly-**1**<sub>105</sub> (30.2 mg) in THF (0.5 mL) and <sup>i</sup>Pr<sub>2</sub>NH (0.5 mL) was added to the mixture of monomer **2** (27.2 mg, 0.06 mmol), CuI (1.1 mg, 0.006 mmol), and internal standard polystyrene (PSt,  $M_n = 44.2$  kDa,  $D = 1.02$ ; 5.0 mg) in THF (1.0 mL) via a syringe ( $[\mathbf{2}]_0 = 0.03$  M,  $[\mathbf{2}]_0/[\text{Pd}]_0 = 100$ ). The solution was stirred at 55 °C and was followed by measuring SEC of the aliquots taking out from the reaction solution at appropriate time intervals. The conversion



of monomer **2** was calculated based on the peak area of unreacted **2** relative to that of the internal PSt standard on the basis of the linear calibration curve.

*High solid content polymerization induced self-assembly process:* Under N<sub>2</sub> atmosphere, *R*-poly-**1**<sub>105</sub> (231.0 mg, 0.05 mmol), monomer **2** (230.0 mg, 0.5 mmol), CuI (6.0 mg, 0.03 mmol) were dissolved in THF (0.3 mL) and <sup>i</sup>Pr<sub>2</sub>NH (0.3 mL). After the resulting mixture was stirred at 55 °C for 12 h, the solution was precipitated into a large amount of *n*-hexane. The precipitated solid was collected by filtration, and washed with acetone to afford the desired chain-extended block copolymer *R*-poly(**1**<sub>105</sub>-*b*-**2**<sub>98</sub>) as a yellow solid (389.2 mg, 84 % yield). SEC:  $M_n = 13.5$  kDa,  $M_w/M_n = 1.16$ .

*AFM and TEM observations.* AFM were performed at room temperature in a dry state using Cypher S microscope (Oxford Instruments), according to the reported literature.<sup>5</sup> Both topographic and phase images of assemblies of different nanostructures were obtained in Tapping Mode using rectangular silicon cantilever with a spring constant of 26 N m<sup>-1</sup>, a resonance frequency lying in the 62-120 kHz range and a radius of curvature of less than 10 nm. Samples were prepared by solvent casting at ambient temperature from a polymerization solution diluted to about 100-folds with THF. A drop (20 μL) of suspension was deposited onto clean silicon wafer and after 2 minutes the excess of solution was removed with blotting paper. Subsequently, the substrate was dried under nitrogen flow for several minutes. Measurements of length and width of the nanofibers were taken using the section Particle Analysis tool provided with the AFM software (Asylum Research).

The samples for TEM investigations were prepared under a way similar to AFM. The

obtained polymerization solutions were diluted 100-fold with THF. And a drop of the solution (20  $\mu\text{L}$ ) was placed on a copper grid for 1 min and then blotted with filter paper to remove excess solution. TEM observations were carried out on a JEM-2100F operating at 200 kV accelerating voltage.

*Emission and CPL analyses.* These experiments were conducted followed the reported literatures with slight modification.<sup>6</sup> Taking the emission and circularly polarized luminescence (CPL) spectra of *R*-poly(**1**<sub>105</sub>-*b*-**2**<sub>98</sub>) as an example. Put the THF solution of *R*-poly(**1**<sub>105</sub>-*b*-**2**<sub>98</sub>) ( $c = 0.2 \text{ mg/mL}$ ) into a fluorescent cuvette (optical path length = 1.0 cm) with a volume of about 3 mL at 25 °C, and the cuvette was installed into Hitachi F-4600 fluorescence spectrophotometer or JASCO CPL-300 spectrometer. The fluorescence and CPL spectrum of the solution was monitored at 25 °C in the range of emission wavelength between 400 and 750 nm, excited by UV light at 364 nm. A drop-coated films prepared on a quartz substrate (Daico MFG, USQ-grade) from a THF solution of the polymers (ca. 40  $\text{mg mL}^{-1}$ ) was used for solid-state spectral measurements. A scanning rate of 100 nm/min, an excitation slit width of 3000  $\mu\text{m}$ , a monitoring slit width of 3000  $\mu\text{m}$ .

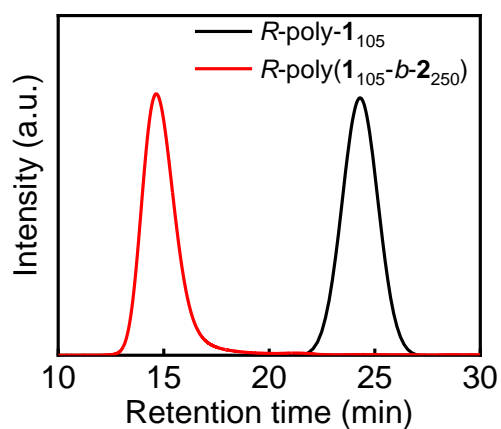

**Fig. S1.** SEC curves of *R*-poly-**1**<sub>105</sub> ( $M_n = 4.7$  kg/mol,  $M_w/M_n = 1.15$ ) and *R*-poly(**1**<sub>105</sub>-*b*-**2**<sub>250</sub>) ( $M_n = 30.5$  kg/mol,  $M_w/M_n = 1.10$ ).

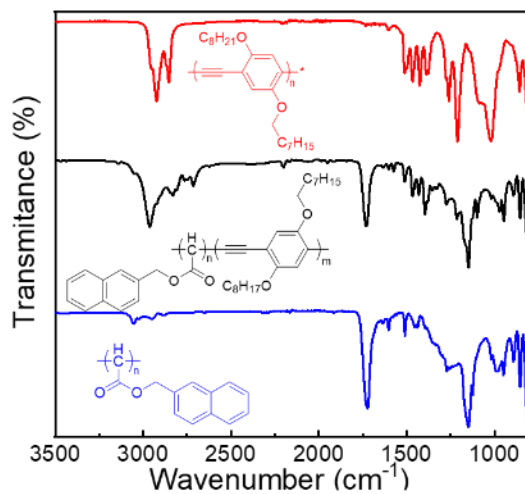

**Fig. S2.** FT-IR spectra of poly-**2**<sub>30</sub>, *R*-poly(**1**<sub>105</sub>-*b*-**2**<sub>98</sub>), and *R*-poly-**1**<sub>105</sub> measured at 25 °C using KBr pellets.

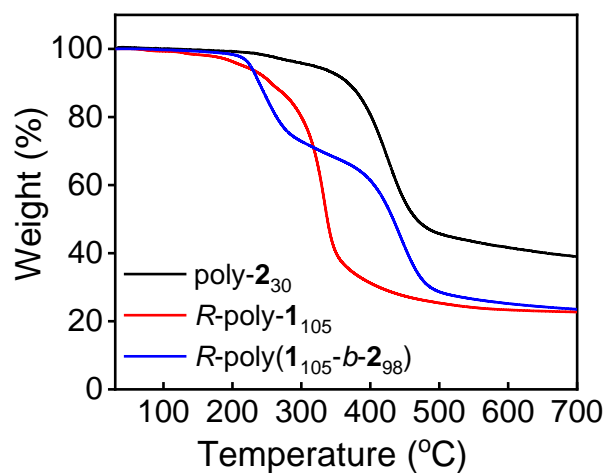

**Fig. S3.** TGA curves of R-poly-1<sub>105</sub>, R-poly(1<sub>105</sub>-b-2<sub>98</sub>) and poly-2<sub>30</sub> (recorded at a heating rate of 10 °C/min under nitrogen atmosphere).

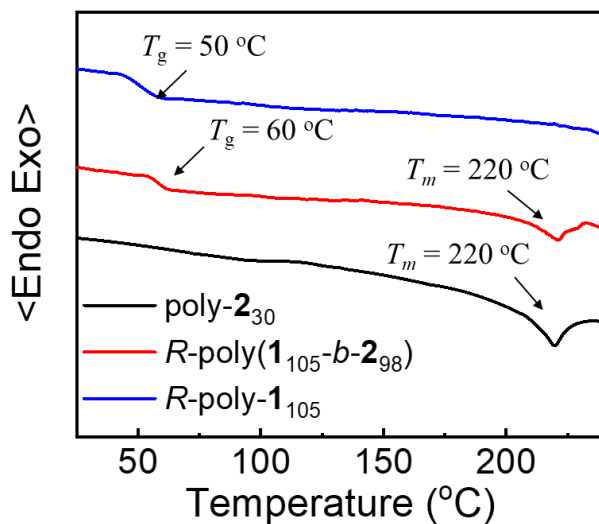

**Fig. S4.** DSC curves of poly-2<sub>30</sub>, R-poly(1<sub>105</sub>-b-2<sub>98</sub>) and R-poly-1<sub>105</sub> (recorded from 30 °C to 250 °C at a heating rate of 10 °C/min under nitrogen atmosphere).

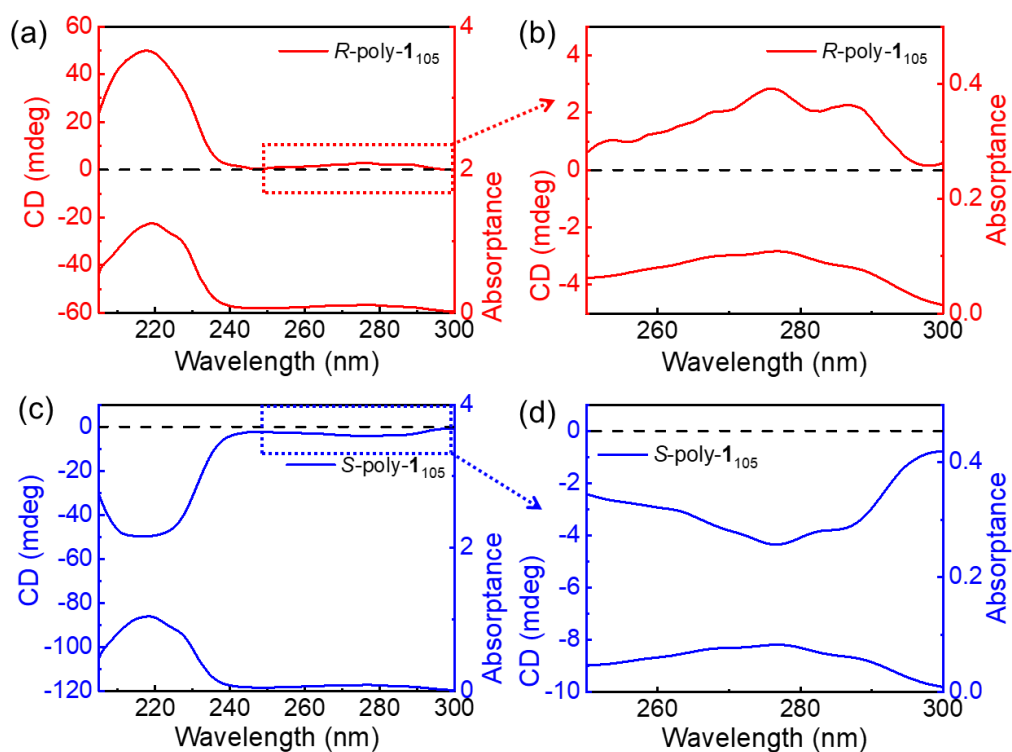

**Fig S5.** CD and UV-vis spectra of *R*-poly-**1**<sub>105</sub> (a) and amplification 250-300 nm (b), *S*-poly-**1**<sub>105</sub> (c) and amplification 250-300 nm (d) recorded in THF at 25 °C (0.2 mg/mL).

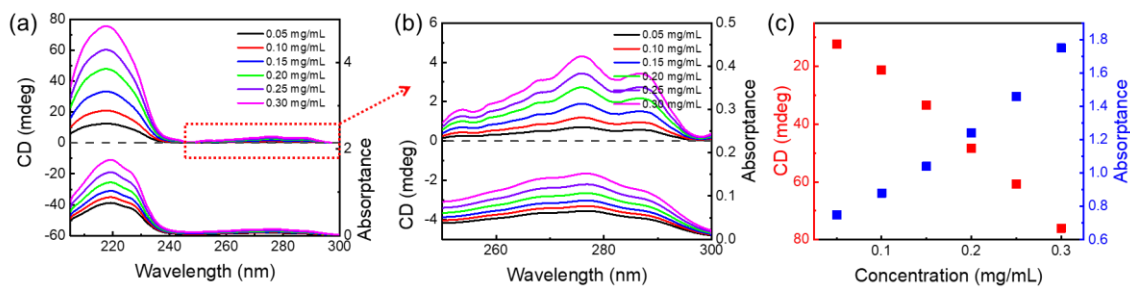

**Fig S6.** (a) CD and UV-vis spectra of *R*-poly-**1**<sub>105</sub> (a) and amplification 250-300 nm (b) measured in THF at different concentrations. (c) Plots of CD and UV-vis intensities at 220 nm with the concentration of *R*-poly-**1**<sub>105</sub> measured in THF at 25 °C.

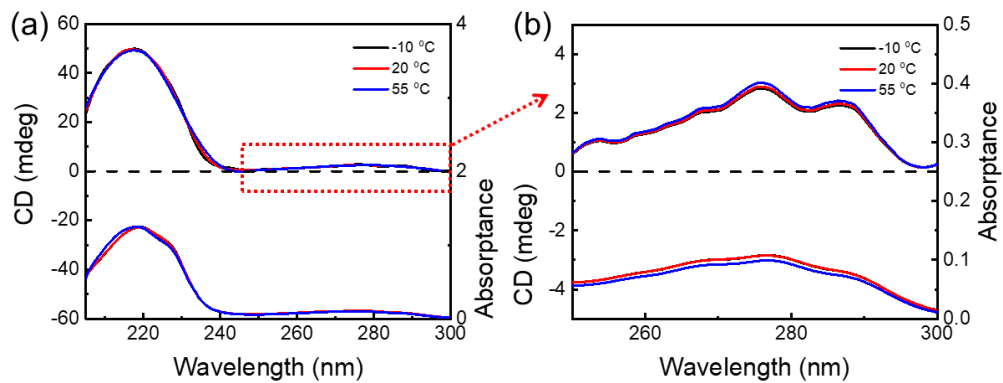

**Fig. S7.** CD and UV-vis spectra of  $R$ -poly- $1_{105}$  (a) and amplification 250-300 nm (b) measured in THF at different temperatures.

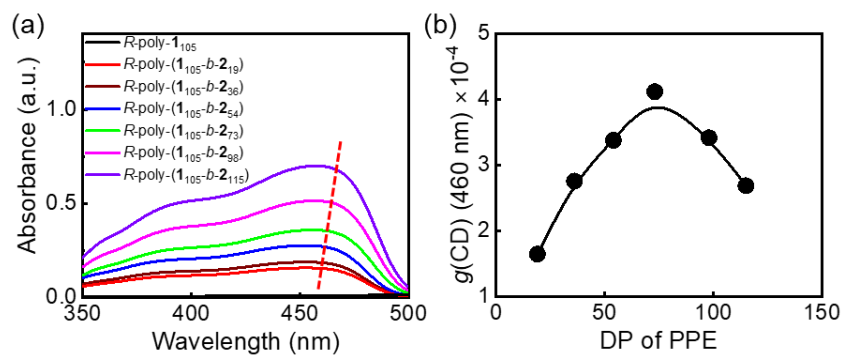

**Fig. S8.** (a) UV-vis spectra of  $R$ -poly( $1_{105}$ - $b$ - $2_n$ ) measured in THF. (b)  $g(\text{CD})$  value at 460 nm of different block copolymers.

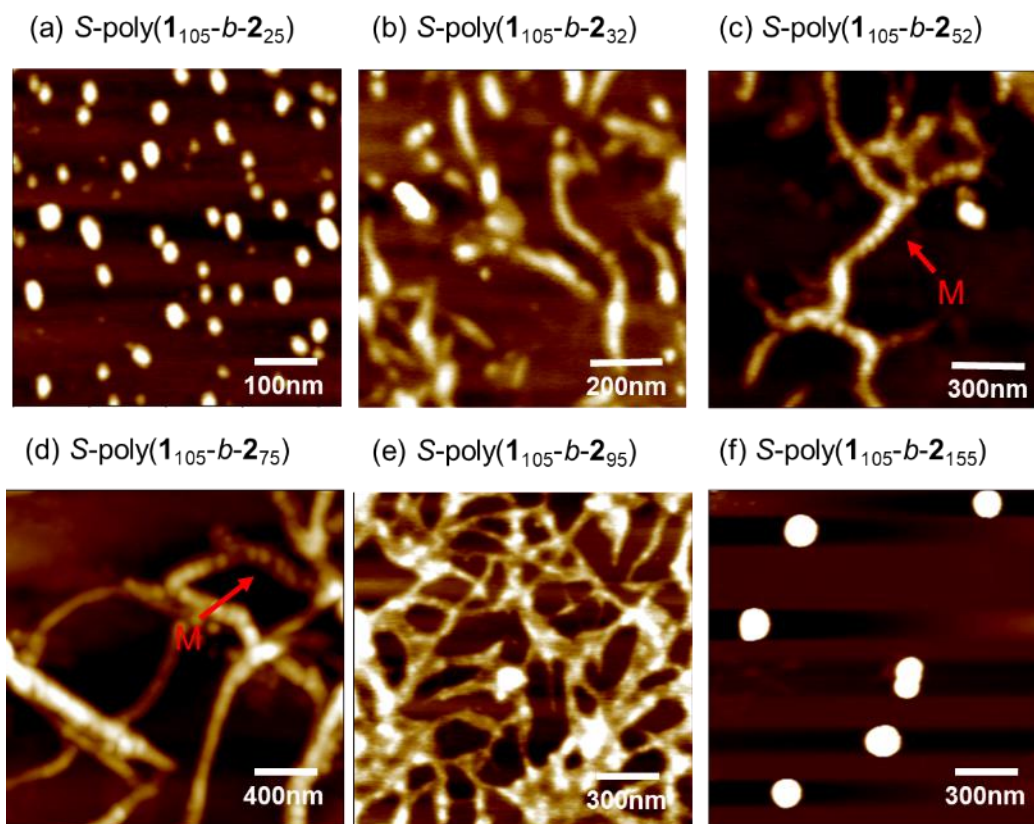

**Fig. S9.** AFM images of the *S*-poly(**1**<sub>105</sub>-*b*-**2**<sub>25</sub>) (a), *S*-poly(**1**<sub>105</sub>-*b*-**2**<sub>32</sub>) (b), *S*-poly(**1**<sub>105</sub>-*b*-**2**<sub>52</sub>) (c), *S*-poly(**1**<sub>105</sub>-*b*-**2**<sub>75</sub>) (d), *S*-poly(**1**<sub>105</sub>-*b*-**2**<sub>95</sub>) (e) and *S*-poly(**1**<sub>105</sub>-*b*-**2**<sub>155</sub>) (f) casted from THF solution (0.2 mg/mL).

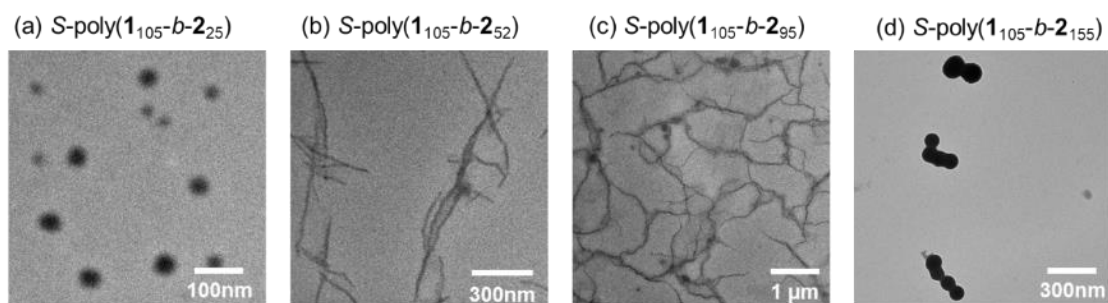

**Fig. S10.** TEM images of the *S*-poly(**1**<sub>105</sub>-*b*-**2**<sub>25</sub>) (a), *S*-poly(**1**<sub>105</sub>-*b*-**2**<sub>52</sub>) (b), *S*-poly(**1**<sub>105</sub>-*b*-**2**<sub>95</sub>) (c), and *S*-poly(**1**<sub>105</sub>-*b*-**2**<sub>155</sub>) (d) casted from THF solution (0.2 mg/mL).

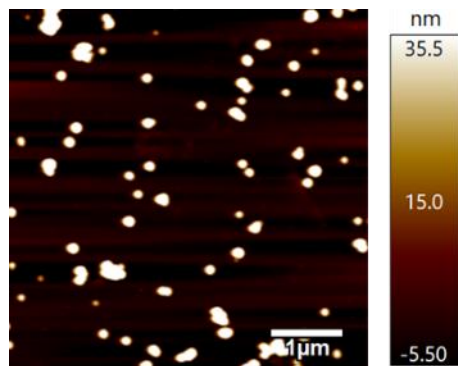

**Fig. S11.** AFM images of the assemblies formed from the equivalent mixtures of *R*-poly(**1**<sub>105</sub>-*b*-**2**<sub>54</sub>) and *S*-poly(**1**<sub>105</sub>-*b*-**2**<sub>52</sub>) in THF (0.2 mg/mL).

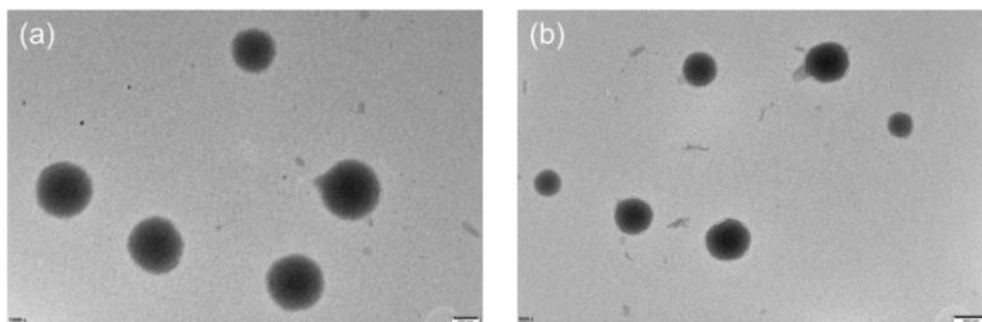

**Fig. S12.** TEM images of the assemblies formed from the equivalent mixtures of *R*-poly(**1**<sub>105</sub>-*b*-**2**<sub>54</sub>) and *S*-poly(**1**<sub>105</sub>-*b*-**2**<sub>52</sub>) in THF (0.2 mg/mL).

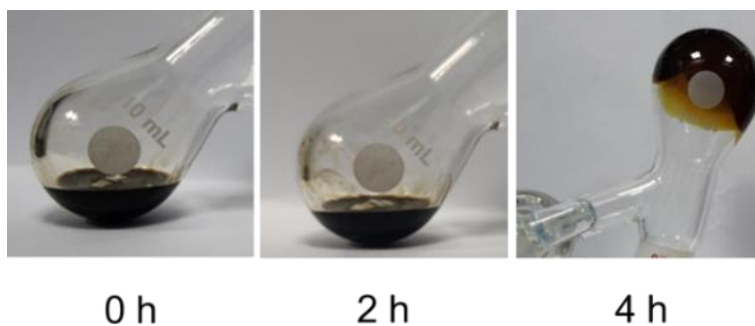

**Fig. S13.** Photographs of the copolymerization solution of monomer **2** initiated by Pd(II)-terminated *R*-poly-**1**<sub>105</sub> in THF at 55 °C ( $[2]_0/[Pd]_0 = 100$ , solids content 53% w/w).



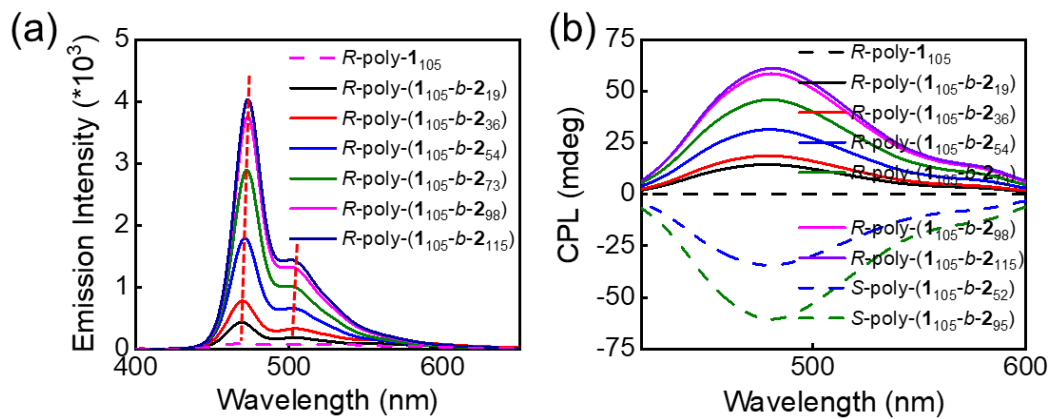

**Fig. S14.** (a) Emission spectra of  $R$ -poly( $1_{105}$ - $b$ - $2_n$ ) copolymers irradiated at 365 nm. (B) CPL spectra of  $R$ - and  $S$ -poly( $1_{105}$ - $b$ - $2_n$ ) irradiated at 380 nm.

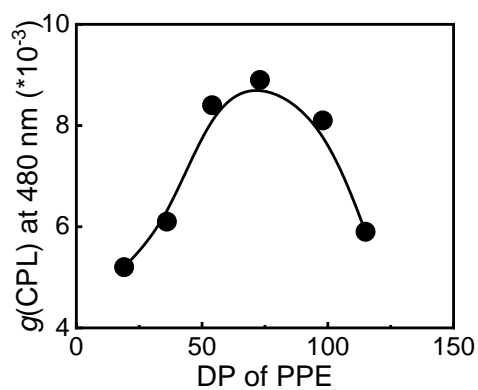

**Fig. S15.** Plot of  $|g_{\text{lum}}|$  against the DP of PPE block of  $R$ -poly( $1_{105}$ - $b$ - $2_n$ ) copolymers.

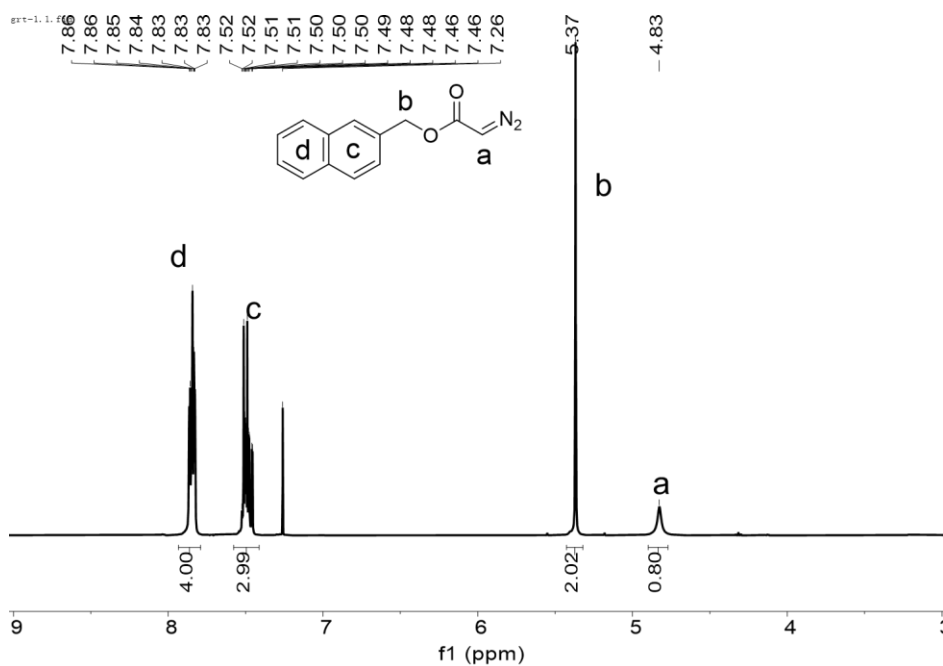

**Fig. S16.** <sup>1</sup>H NMR (600 MHz) spectra of **1** recorded in CDCl<sub>3</sub> at room temperature.

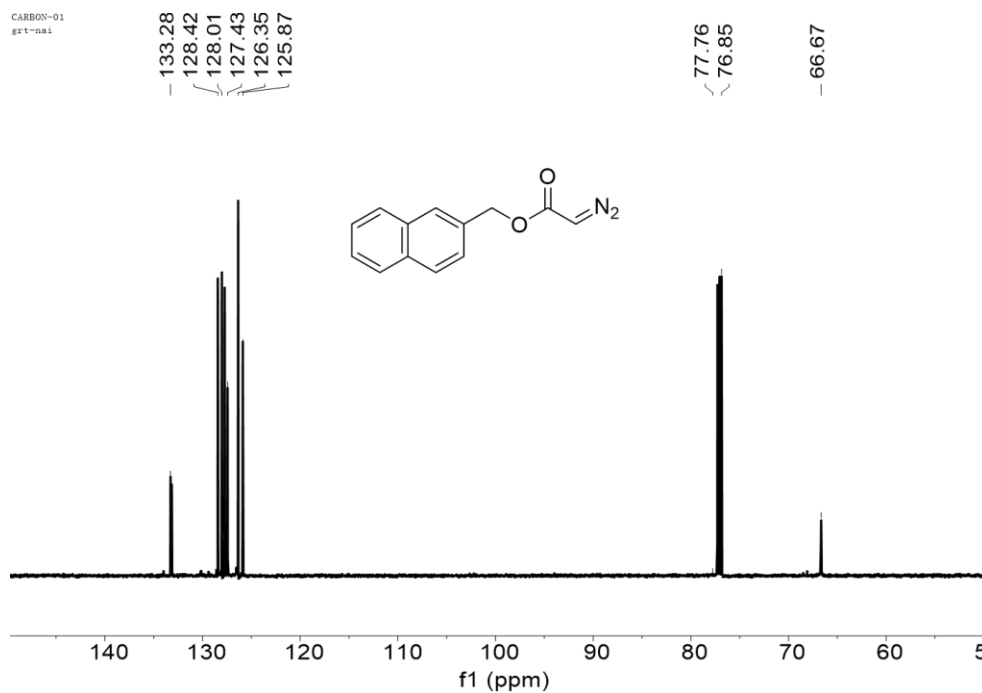

**Fig. S17.** <sup>13</sup>C NMR (150 MHz) spectrum of **1** measured in CDCl<sub>3</sub> at room temperature.

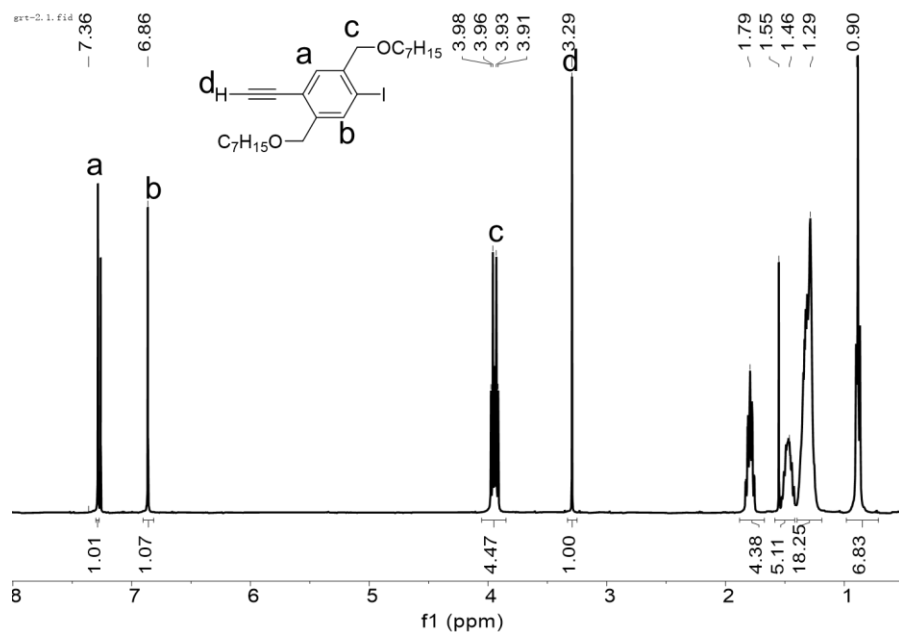

**Fig. S18.**  $^1\text{H}$  NMR (600 MHz) spectra of **2** recorded in  $\text{CDCl}_3$  at room temperature.

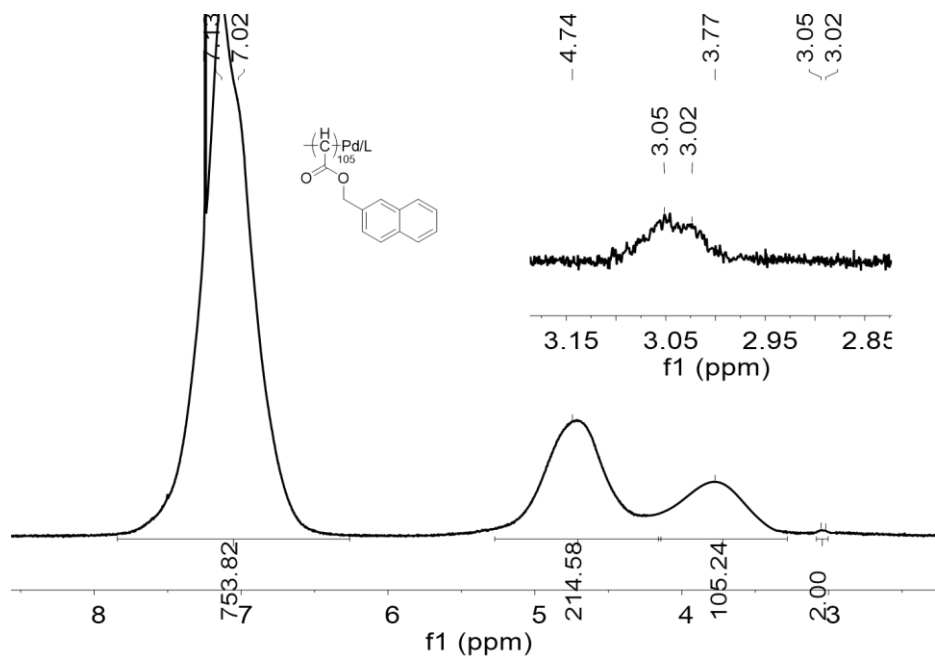

**Fig. S19.**  $^1\text{H}$  NMR (400 MHz) spectra of *R*-poly-**1**<sub>105</sub> recorded in  $\text{CDCl}_3$  at room temperature.

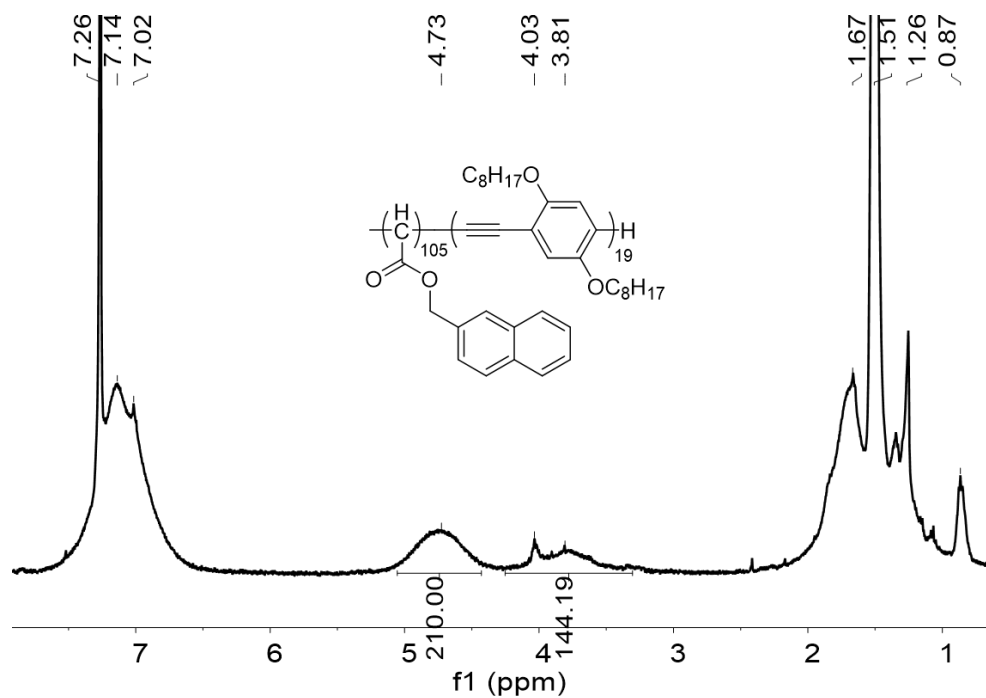

**Fig. S20.**  $^1\text{H}$  NMR (400 MHz) spectra of  $R$ -poly( $\mathbf{1}_{105}$ - $b$ - $\mathbf{2}_{19}$ ) recorded in  $\text{CDCl}_3$  at room temperature.

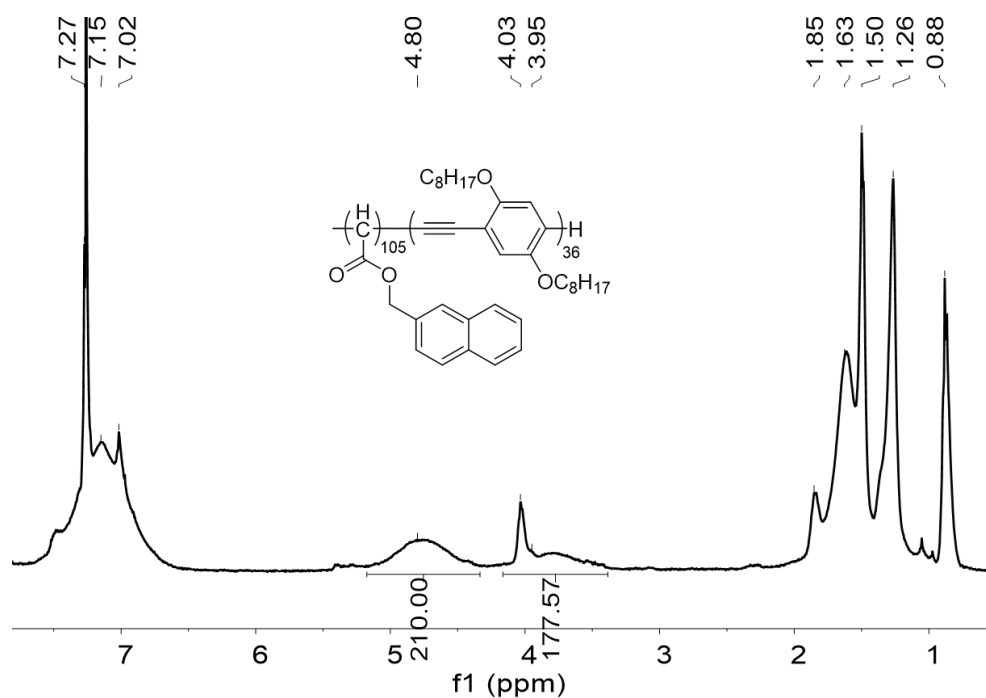

**Fig. S21.**  $^1\text{H}$  NMR (400 MHz) spectra of  $R$ -poly( $\mathbf{1}_{105}$ - $b$ - $\mathbf{2}_{36}$ ) recorded in  $\text{CDCl}_3$  at room temperature.

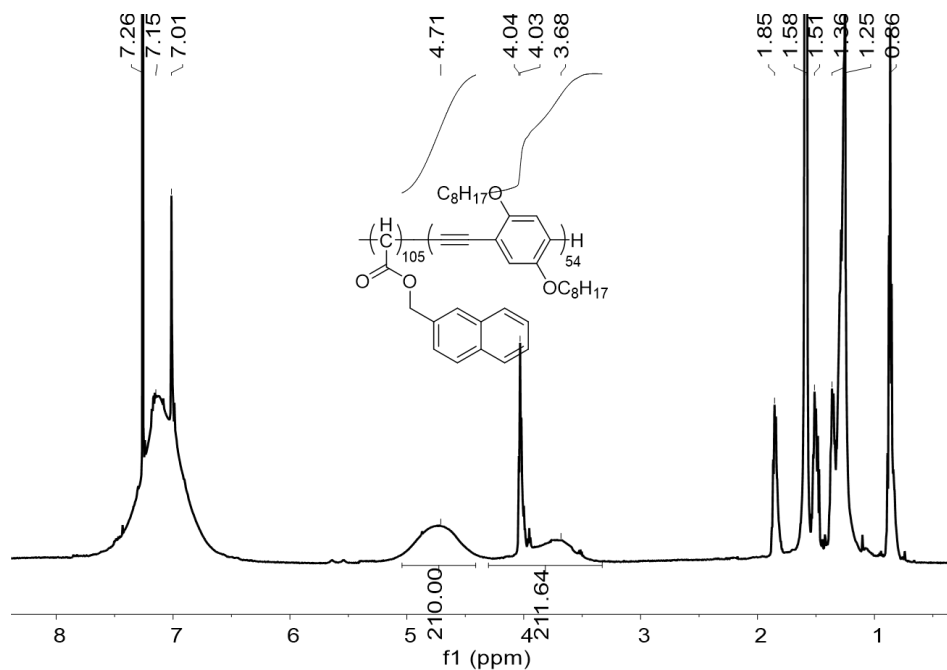

**Fig. S22.**  $^1\text{H}$  NMR (400 MHz) spectra of  $R$ -poly( $\mathbf{1}_{105}$ - $b$ - $\mathbf{2}_{54}$ ) recorded in  $\text{CDCl}_3$  at room temperature.

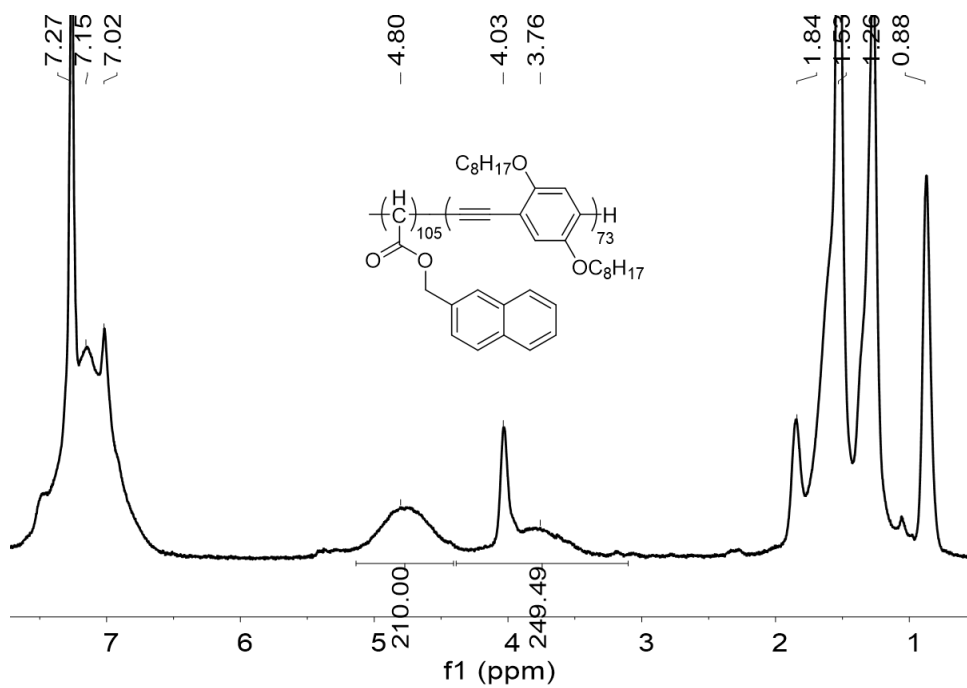

**Fig. S23.**  $^1\text{H}$  NMR (400 MHz) spectra of  $R$ -poly( $\mathbf{1}_{105}$ - $b$ - $\mathbf{2}_{73}$ ) recorded in  $\text{CDCl}_3$  at room temperature.

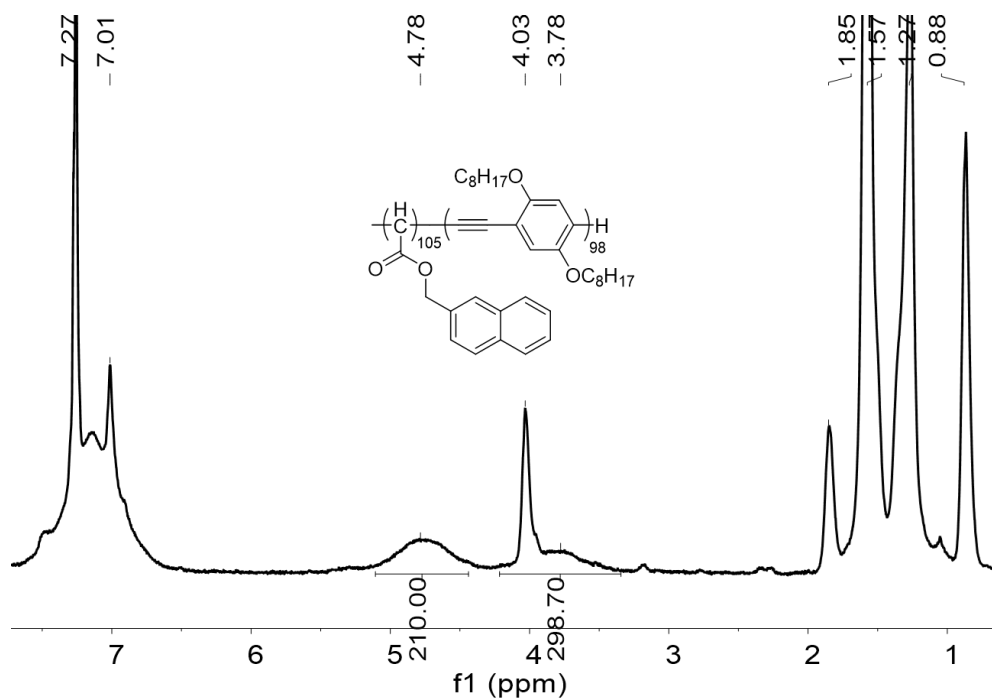

**Fig. S24.**  $^1\text{H}$  NMR (400 MHz) spectra of  $R$ -poly( $\mathbf{1}_{105}$ - $b$ - $\mathbf{2}_{98}$ ) recorded in  $\text{CDCl}_3$  at room temperature.

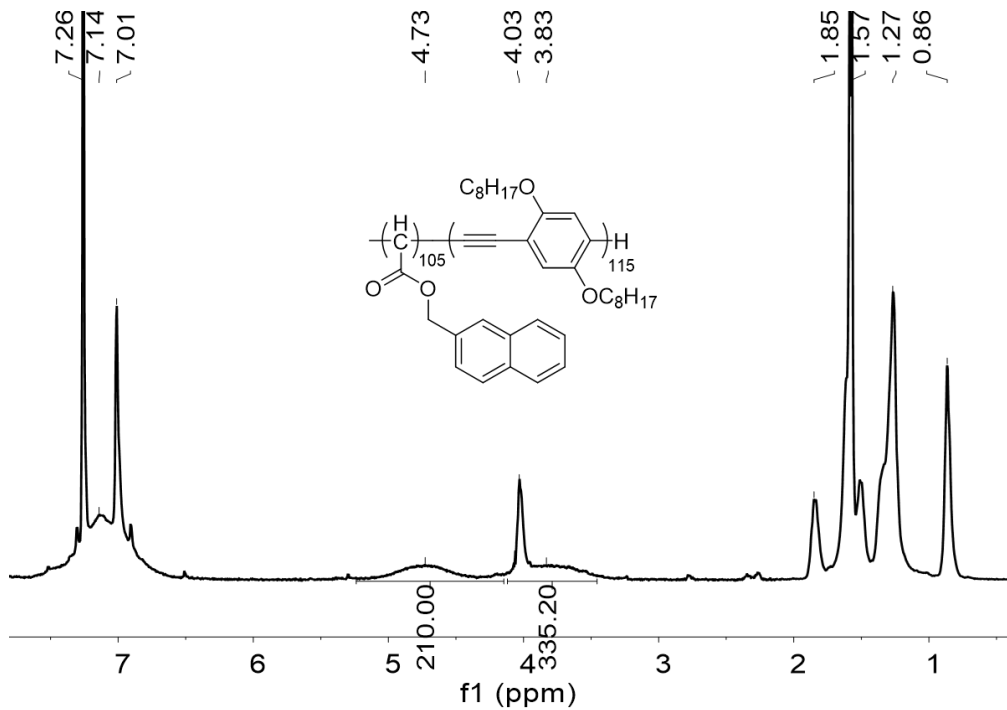

**Fig. S25.**  $^1\text{H}$  NMR (400 MHz) spectra of  $R$ -poly( $\mathbf{1}_{105}$ - $b$ - $\mathbf{2}_{115}$ ) recorded in  $\text{CDCl}_3$  at room temperature.

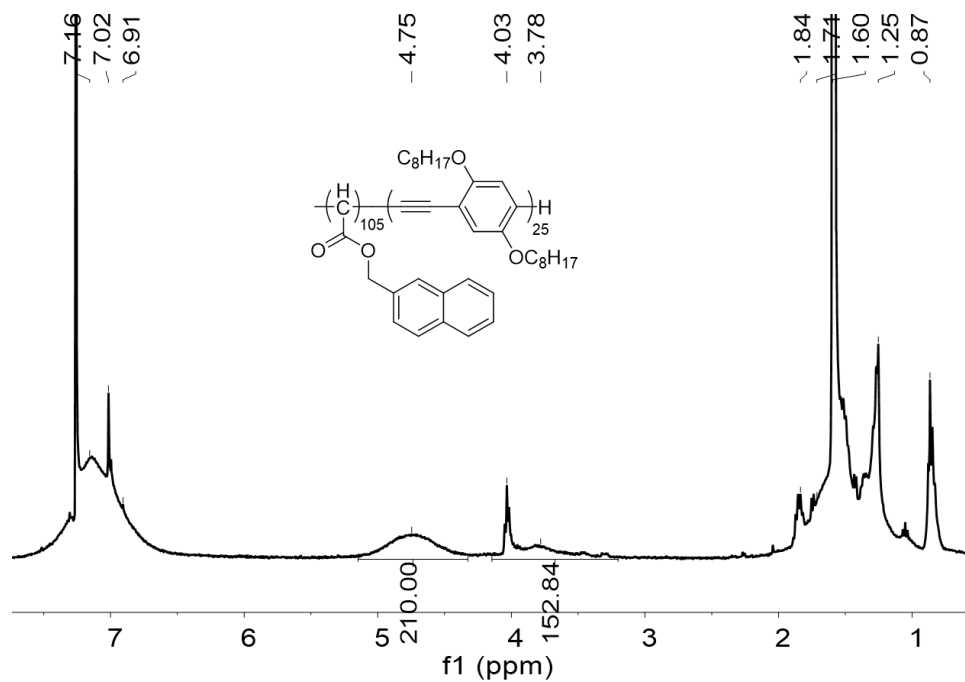

**Fig. S26.** <sup>1</sup>H NMR (400 MHz) spectra of *S*-poly(**1**<sub>105</sub>-*b*-**2**<sub>25</sub>) recorded in CDCl<sub>3</sub> at room temperature.

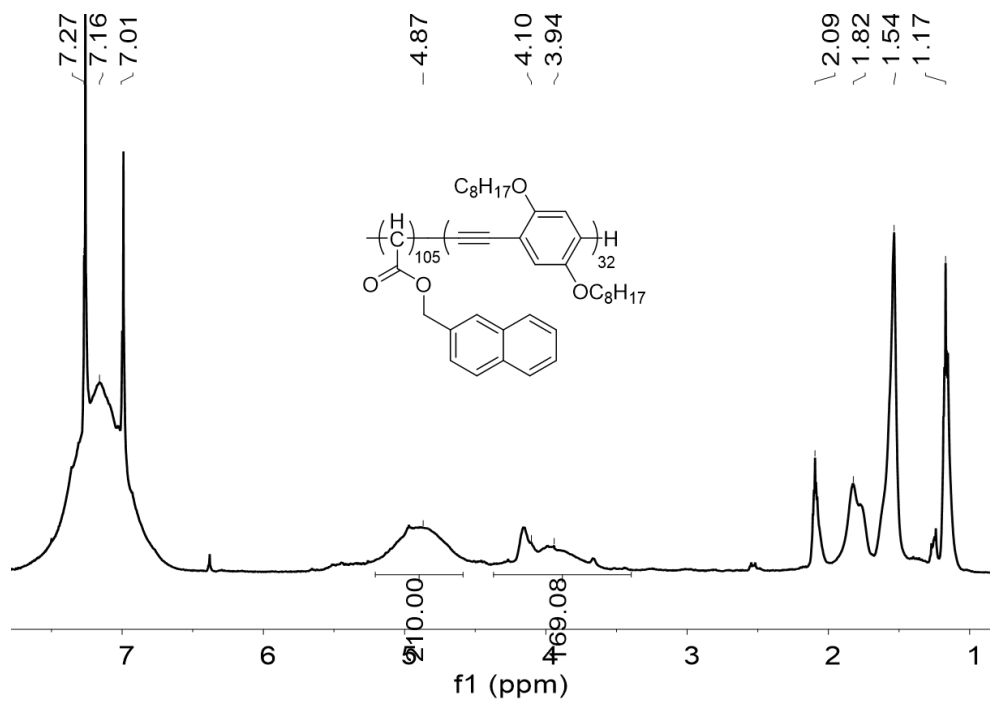

**Fig. S27.** <sup>1</sup>H NMR (400 MHz) spectra of *S*-poly(**1**<sub>105</sub>-*b*-**2**<sub>32</sub>) recorded in CDCl<sub>3</sub> at room temperature.

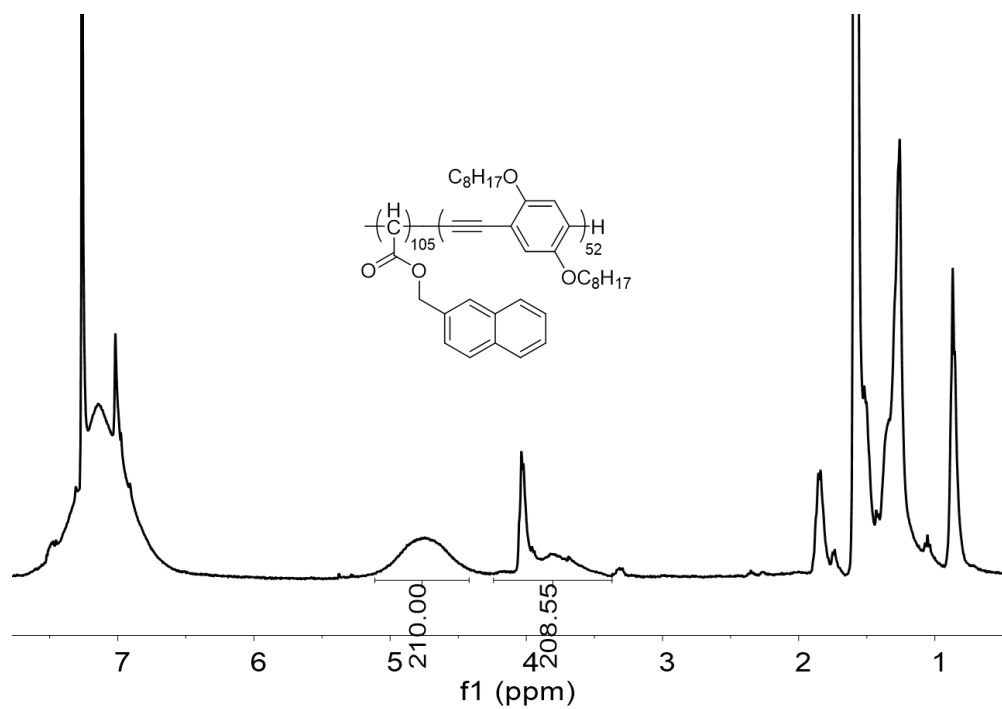

**Fig. S28.**  $^1\text{H}$  NMR (400 MHz) spectra of *S*-poly(**1**<sub>105</sub>-*b*-**2**<sub>52</sub>) recorded in  $\text{CDCl}_3$  at room temperature.

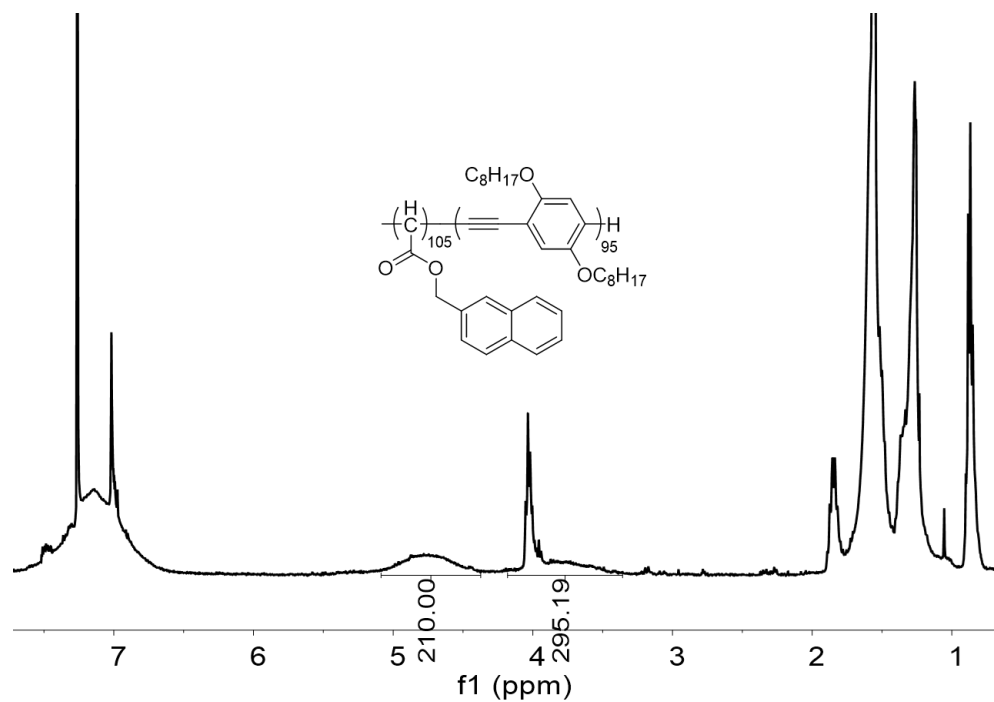

**Fig. S29.**  $^1\text{H}$  NMR (400 MHz) spectra of *S*-poly(**1**<sub>105</sub>-*b*-**2**<sub>95</sub>) recorded in  $\text{CDCl}_3$  at room temperature.



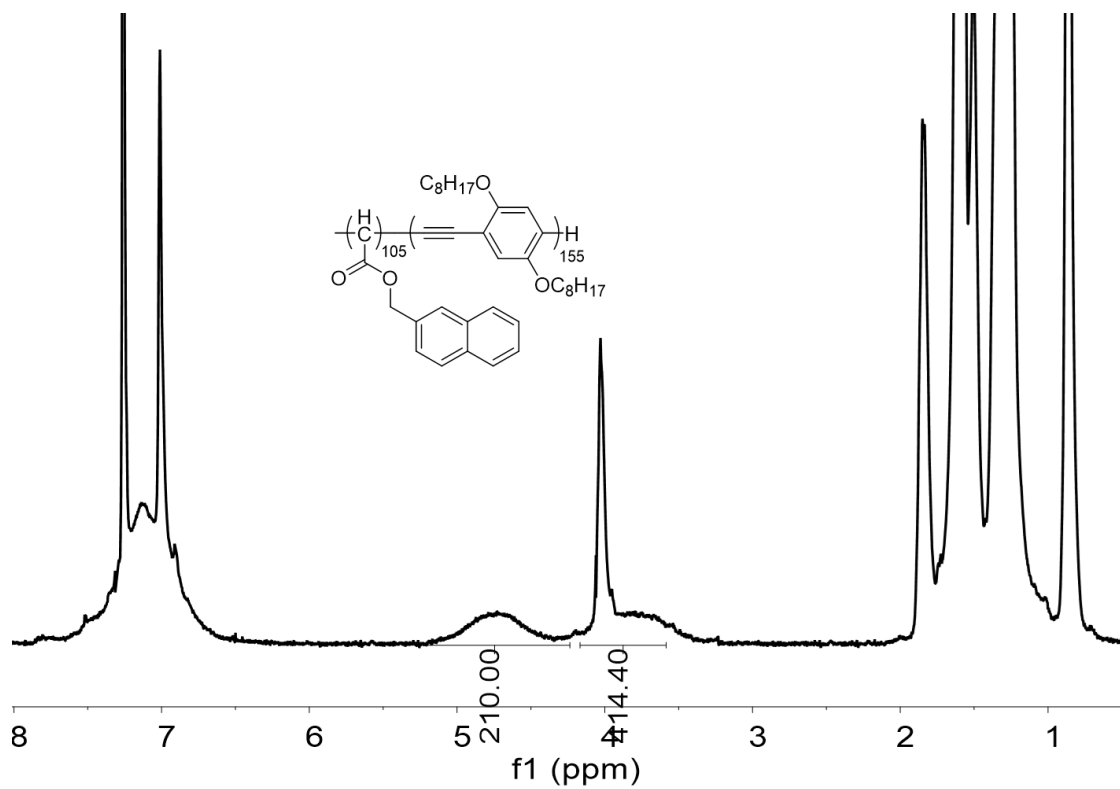

**Fig. S30.** <sup>1</sup>H NMR (400 MHz) spectra of *S*-poly(**1**<sub>105</sub>-*b*-**2**<sub>155</sub>) recorded in CDCl<sub>3</sub> at room temperature.

## References

1. T. Toma, J. Shimokawa, T. Fukuyama, N, N'-Ditosylhydrazine: A Convenient Reagent for Facile Synthesis of Diazoacetates. *Org. Lett.* 2007, **9**, 3195–3197.
2. L. Zhou, X.-H. Xu, Z.-Q. Jiang, L. Xu, B.-F. Chu, N. Liu, Z.-Q. Wu, Selective Synthesis of Single-Handed Helical Polymers from Achiral Monomer and a Mechanism Study on Helix-Sense-Selective Polymerization. *Angew. Chem. Int. Ed.* 2021, **60**, 806–812.
3. M. Su, N. Liu, Q. Wang, H. Wang, J. Yin, Z.-Q. Wu, Facile Synthesis of Poly(phenyleneethynylene)-block-Polyisocyanide Copolymers via Two Mechanistically Distinct, Sequential Living Polymerizations Using a Single Catalyst. *Macromolecules* 2016, **49**, 110–119.
4. W. Zhou, X. Su, M. Tao, C. Zhu, Q. Zhao, J. Zhang, Chiral Sulfinamide Bisphosphine Catalysts: Design, Synthesis, and Application in Highly Enantioselective Intermolecular Cross-Rauhut–Currier Reactions. *Angew. Chem. Int. Ed.* 2015, **54**, 14853–14857.
5. C. Grazon, P. Salas-Ambrosio, E. Ibarboure, A. Buol, E. Garanger, M. W. Grinstaff, S. Lecommandoux, C. Bonduelle, Aqueous Ring-Opening Polymerization-Induced Self - Assembly (ROPISA) of N-Carboxyanhydrides. *Angew. Chem., Int. Ed.* 2020, **59**, 622–626.
6. T. Ikai, M. Okubo, Y. Wada, Helical Assemblies of One-Dimensional Supramolecular

Polymers Composed of Helical Macromolecules: Generation of Circularly Polarized Light Using an Infinitesimal Chiral Source. *J. Am. Chem. Soc.* 2020, **142**, 3254–3261.
